# Supplementary material for: Effect of cosolvents on the phase separation of polyelectrolyte complexes
Source: Royal Society of Chemistry journal article supplement (doi:10.1039/d4sm00903g), 2024-01-01
Supplement: d4sm00903g1.pdf [file d4sm00903g1.pdf]

# Supporting Information

## Effect of Cosolvents on the Phase Separation of Polyelectrolyte Complexes

*Yuanchi Ma*<sup>a,\*</sup>, *Robert J. S. Ivancic*<sup>b</sup>, *Jan Obrzut*<sup>b</sup>, *Debra J. Audus*<sup>b</sup>, *Vivek M. Prabhu*<sup>b,\*</sup>

<sup>a</sup>. College of Polymer Science and Engineering, Qingdao University of Science and Technology, Qingdao, Shandong, China

<sup>b</sup>. Materials Science and Engineering Division, Material Measurement Laboratory, National Institute of Standards and Technology, 100 Bureau Drive, Gaithersburg, MD, United States

## Section I. Dielectric Constant Measurement

Details of the dielectric measurements were described in the main text. The cosolvents, ethylene glycol (EG) and N-methylformamide (NMF), were selected, since they are both miscible with water and have moderate solubilities to the two polyelectrolytes and the salt (KBr). To summarize, the real ( $\epsilon'$ ) and imaginary ( $\epsilon''$ ) parts of the dielectric constant were plotted on the Cole-Cole complex plane, and in all cases, the data show typical shape of Cole-Cole semi-circles (**Figure 5a**, showed the binary mixture NMF/H<sub>2</sub>O, as an example). In order to determine  $\epsilon_0$ , we employed the single dielectric relaxation model of Debye:

$$\epsilon''(\omega) = \frac{(\epsilon_0 - \epsilon_\infty)\omega\tau}{1 + \omega^2\tau^2} \quad (\text{S1})$$

which can be rearranged to give:

$$\omega\epsilon''(\omega) = \frac{1}{\tau}(\epsilon_0 - \epsilon'(\omega)) \quad (\text{S2})$$

Figure S1 demonstrate the linear relationship of  $\omega\epsilon''$  and  $\epsilon'$  denoted by equation S2 for the solvent mixtures of EG/H<sub>2</sub>O. Consequently, the static dielectric constants  $\epsilon_0$  can be determined from the horizontal intercepts.

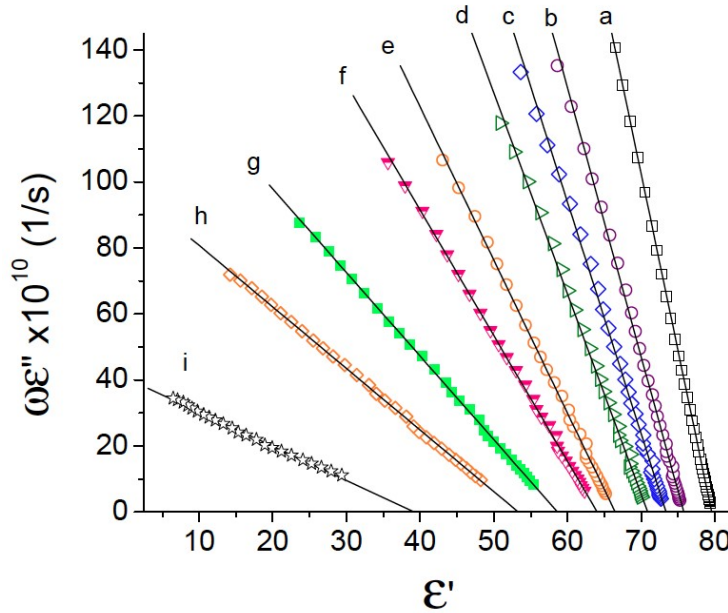

**Figure S1.** Plots of equation S2,  $\omega\epsilon''(\omega)$  vs  $\epsilon'(\omega)$ , for the following volume concentrations of EG in H<sub>2</sub>O: (a) 0 (pure water), (b) 13.1 %, (c) 20.8 %, (d) 28.3 %, (e) 40.8 %, (f) 48.5 %, (g) 63.2 %, (h) 75.0 %, (i) 100% (pure EG). Solid lines are linear fits through the data points.



## Uncertainty evaluation

Uncertainty was estimated by the quadrature method, which yields a standard uncertainty estimate (with a 68 % confidence interval) and is especially useful and effective in the case of several variables that weight the uncertainty non-uniformly. Here, the relative uncertainties in the broadband dielectric measurements are within 2 % of the measured  $\varepsilon''$  and  $\varepsilon'$  values. The standard errors estimated from the least-square linear fitting of  $\varepsilon_0$  results,  $\Delta\varepsilon_{0,\text{fit}}$ , are within  $\pm 0.25$  (Figure 5b, 5c and Figure S1). The combined standard uncertainty, estimated from the square root of quadrature model,<sup>1</sup> is obtained from equation S3:

$$\Delta\varepsilon_0/\varepsilon_0 = [((\Delta\varepsilon'')/\varepsilon'')^2 + ((\Delta\varepsilon')/\varepsilon')^2 + ((\Delta\varepsilon_{0,\text{fit}})/\varepsilon_0)^2]^{1/2} \quad (\text{S3})$$

The measured  $\varepsilon_0$  values and their calculated errors (Err  $\pm$ ) obtained for the two binary and the one ternary mixtures are summarized in Table S1 – S3, and illustrated in Figure S2.

**Table S1.** Static dielectric constant,  $\varepsilon_0$ , of the NMF/H<sub>2</sub>O mixtures

| Vol fraction % of NMF in H <sub>2</sub> O | $\varepsilon_0$ | Err $\pm$ |
|-------------------------------------------|-----------------|-----------|
| 0                                         | 79.6            | 1.8       |
| 16.7                                      | 84.0            | 1.9       |
| 25.7                                      | 86.5            | 2.0       |
| 36.9                                      | 90.1            | 2.1       |
| 48.7                                      | 95.1            | 2.2       |
| 59.2                                      | 101.1           | 2.3       |
| 67.2                                      | 107.6           | 2.5       |
| 78.7                                      | 120.0           | 2.8       |
| 85.0                                      | 131.6           | 3.1       |
| 100                                       | 176.2           | 4.2       |

**Table S2.** Static dielectric constant,  $\varepsilon_0$ , of the EG/H<sub>2</sub>O mixtures

| Vol fraction % of EG in H <sub>2</sub> O | $\varepsilon_0$ | Err $\pm$ |
|------------------------------------------|-----------------|-----------|
| 0                                        | 79.6            | 1.6       |
| 13.1                                     | 75.8            | 1.7       |
| 20.8                                     | 73.4            | 1.7       |
| 28.8                                     | 70.9            | 1.6       |
| 40.8                                     | 66.8            | 1.5       |
| 48.5                                     | 64.0            | 1.4       |
| 63.2                                     | 58.7            | 1.2       |
| 85.0                                     | 53.3            | 1.1       |
| 100                                      | 39.2            | 1.0       |

**Table S3.** Static dielectric constant,  $\epsilon_0$ , of the EG/NMF/H<sub>2</sub>O mixtures

| Vol fraction % of<br>EG: NMF: H <sub>2</sub> O | $\epsilon_0$ | Err $\pm$ |
|------------------------------------------------|--------------|-----------|
| 33.4 : 52.4 : 14.2                             | 69.3         | 1.5       |
| 17.0 : 76.2 : 6.8                              | 75.6         | 1.7       |

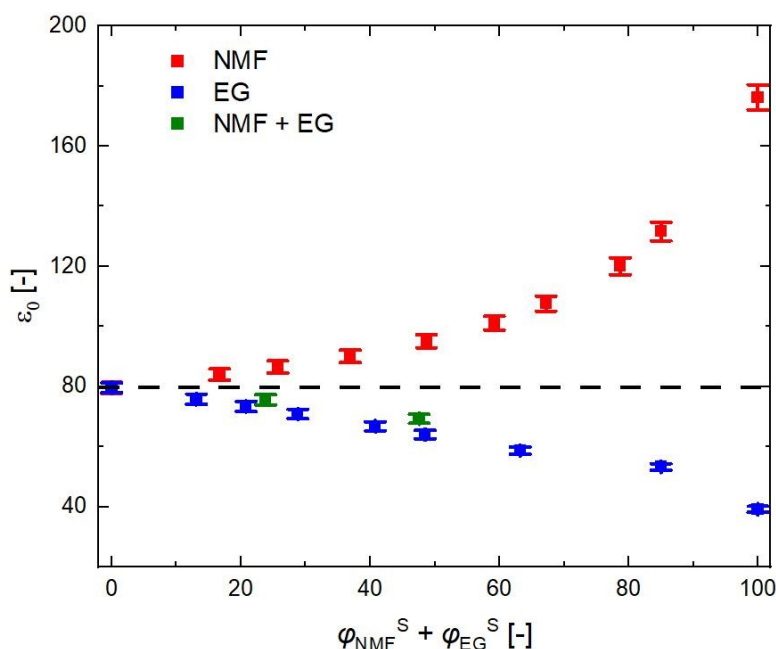

**Figure S2.** Summary of the dielectric constants ( $\epsilon_0$ ) of the binary and ternary solvent mixtures as a function of  $(\phi_{\text{EG}}^S + \phi_{\text{NMF}}^S)$  as measured by dielectric experiments ( $\phi^S$  denotes the cosolvent volume fraction relative to the total solvent volume). The dashed line marks the dielectric constant of pure water, for visual aid only.

## Section II. Estimation of $\chi$ by Group Contribution Method

Potassium poly(styrene sulfonate) (KPSS) and poly(diallyldimethylammonium) bromide (PDADMAB) structures were approximated by group contribution methods in the form of their uncharged equivalent structures, PSS<sup>-</sup> and PDADMA<sup>+</sup>, respectively, as shown in Scheme S1.

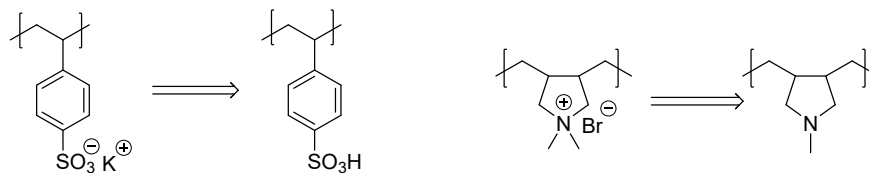

**Scheme S1.** The uncharged equivalent structures of PSS<sup>-</sup> and PDADMA<sup>+</sup> used in the calculation of solubility parameters.

**Table S4.**  $\delta_d$ ,  $\delta_p$  and  $\delta_h$  of water, EG and NMF.

| Solvent          | $v_m$ [cm <sup>3</sup> /mol] | $\delta_d$ [J <sup>1/2</sup> /cm <sup>3/2</sup> ] | $\delta_p$ [J <sup>1/2</sup> /cm <sup>3/2</sup> ] | $\delta_h$ [J <sup>1/2</sup> /cm <sup>3/2</sup> ] |
|------------------|------------------------------|---------------------------------------------------|---------------------------------------------------|---------------------------------------------------|
| H <sub>2</sub> O | 18.1                         | 12.3                                              | 31.3                                              | 34.2                                              |
| EG               | 55.9                         | 17.0                                              | 11.0                                              | 26.0                                              |
| NMF              | 59.1                         | 17.4                                              | 18.8                                              | 15.9                                              |

The Hansen solubility parameter of each molecule is composed of three parts,  $\delta_d$ ,  $\delta_p$  and  $\delta_h$ , which represent the dispersion, dipolar, and hydrogen bonding contribution to its cohesive energy density, and act as the coordinates for a point in the 3D space known as the Hansen space. The miscibility of a polymer and a solvent can thus be empirically estimated by the relative distance between the two points in the Hansen space. The  $\delta$  components of common solvents under room temperature are well-documented in the literature (Table S4),<sup>2</sup> while those of polymers can be calculated using the following equations (eqs. S4 – S6):

$$\delta_d = \sum F_{d,i}/v_m \quad (\text{S4})$$

$$\delta_p = \sqrt{\sum F_{p,i}^2/v_m} \quad (\text{S5})$$

$$\delta_h = \sqrt{\sum E_{h,i}/v_m} \quad (\text{S6})$$

in which  $F_{d,i}$ ,  $F_{p,i}$  and  $E_{h,i}$  are the cohesive energy contributions of dispersion force, dipolar interaction and hydrogen bonding from *each group* in a monomer, with the molar volume of  $v_m$ .<sup>2</sup> Table S5 and S6 summarize the group contributions of  $F_{d,i}$ ,  $F_{p,i}$  and  $E_{h,i}$  in PSS and PDADMA, respectively.

**Table S5.** Group contributions of  $F_{d,i}$ ,  $F_{p,i}$  and  $E_{h,i}$  in PSS.<sup>2</sup>

| Group                                                                               | Number | $F_{d,i}$ [J <sup>1/2</sup> cm <sup>3/2</sup> mol <sup>-1</sup> ] | $F_{p,i}^2$ [J cm <sup>3</sup> mol <sup>-2</sup> ] | $E_{h,i}$ [J mol <sup>-1</sup> ] |
|-------------------------------------------------------------------------------------|--------|-------------------------------------------------------------------|----------------------------------------------------|----------------------------------|
| -CH <sub>2</sub> -                                                                  | 1      | 270                                                               | 0                                                  | 0                                |
| -CH<                                                                                | 1      | 80                                                                | 0                                                  | 0                                |
| 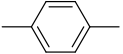 | 1      | 1270                                                              | 12100                                              | 0                                |
| -SO <sub>2</sub> - <sup>3</sup>                                                     | 1      | 597                                                               | 2117025                                            | 11347                            |
| -OH                                                                                 | 1      | 210                                                               | 250000                                             | 20000                            |
| Total                                                                               |        | 2427                                                              | 2379125                                            | 31347                            |

For PSS,  $v_m = M_0/\rho = 184/1.11 = 166$  cm<sup>3</sup>/mol.

Therefore,  $\delta_d = 2427/166 = 14.6$  J<sup>1/2</sup>cm<sup>-3/2</sup>;  $\delta_p = (2379125)^{1/2}/166 = 9.29$  J<sup>1/2</sup>cm<sup>-3/2</sup>;  $\delta_h = (31347/166)^{1/2} = 13.7$  J<sup>1/2</sup>cm<sup>-3/2</sup>.

**Table S6.** Group contributions of  $F_{d,i}$ ,  $F_{p,i}$  and  $E_{h,i}$  in PDADMA.<sup>2</sup>

| Group              | Number | $F_{d,i}$ [ $\text{J}^{1/2}\text{cm}^{3/2}\text{mol}^{-1}$ ] | $F_{p,i}^2$ [ $\text{J cm}^3\text{mol}^{-2}$ ] | $E_{h,i}$ [ $\text{J mol}^{-1}$ ] |
|--------------------|--------|--------------------------------------------------------------|------------------------------------------------|-----------------------------------|
| -CH <sub>2</sub> - | 4      | 270                                                          | 0                                              | 0                                 |
| -CH<               | 2      | 80                                                           | 0                                              | 0                                 |
| -CH <sub>3</sub>   | 1      | 420                                                          | 0                                              | 0                                 |
| -N<                | 1      | 20                                                           | 640000                                         | 5000                              |
| Total              |        | 1680                                                         | 640000                                         | 5000                              |

For PDADMA,  $v_m = M_0/\rho = 111/1.09 = 102 \text{ cm}^3/\text{mol}$ .

Therefore,  $\delta_d = 1680/102 = 16.47 \text{ J}^{1/2}\text{cm}^{-3/2}$ ;  $\delta_p = (640000)^{1/2}/102 = 7.84 \text{ J}^{1/2}\text{cm}^{-3/2}$ ;  $\delta_h = (5000/102)^{1/2} = 7.00 \text{ J}^{1/2}\text{cm}^{-3/2}$ .

Subsequently, the  $\chi$  values between the polymers (PSS, PDADMA) and the solvents (H<sub>2</sub>O, EG, NMF) can be calculated using equation S7:<sup>4,5</sup>

$$\chi = \frac{\alpha' l^3}{RT} [(\delta_{d,1} - \delta_{d,2})^2 + 0.25(\delta_{p,1} - \delta_{p,2})^2 + 0.25(\delta_{h,1} - \delta_{h,2})^2] \quad (\text{S7})$$

where  $\alpha'$  is a prefactor in the range of zero to unity,  $R$  is the ideal gas constant, and  $T$  is the temperature in Kelvin. The subscripts 1 and 2 denote the solvent and the polymer, respectively. Here, we explicitly take the reference volume to be  $l^3 = 0.0366 \text{ nm}^3$  rather than the typical solvent volume  $v_{m,1}$  so that our reference volume is constant throughout the text. By taking  $\alpha' = 0.193$  and  $T = 293 \text{ K}$ , the results of  $\chi$  are summarized in Table 2 of the main text, and their relations to the dielectric constants are shown in Figure S3.

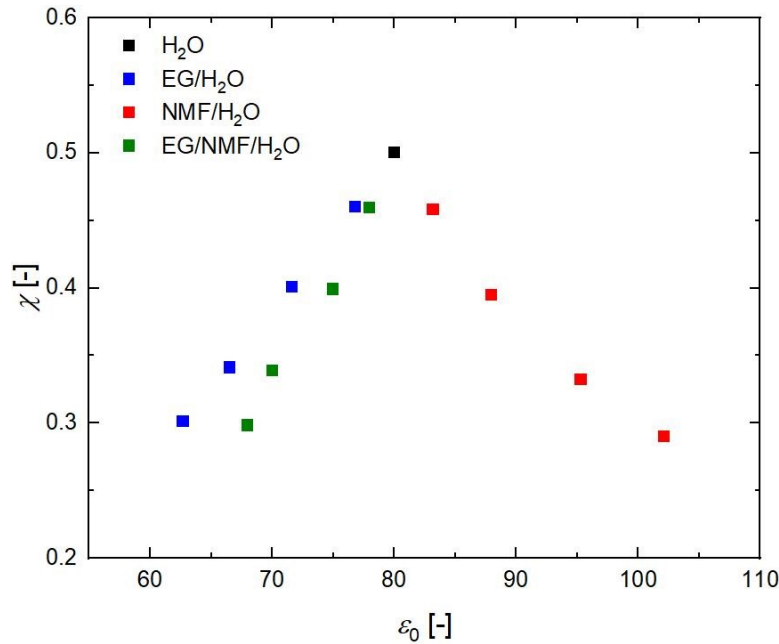**Figure S3.**  $\chi$  as a function of  $\epsilon_0$  for the solvent mixtures.

## Section III. Voorn-Overbeek (VO) Modelling of the Experimental Data

### Parameterization of VO model at 293 K

VO theory is used to describe the phase separation of KPSS-PDADMAB complexes:

$$\frac{l^3 f(\varphi_p, \varphi_s)}{VkT} = \frac{\varphi_p}{N} \ln \left( \frac{\varphi_p}{2} \right) + \varphi_s \ln \left( \frac{\varphi_s}{2} \right) + \varphi_0 \ln \varphi_0 + \chi \varphi_p \varphi_0 - \alpha (\varphi_s + \sigma \varphi_p)^{3/2} \quad (\text{S8})$$

As an on-lattice theory, VO in their original publications<sup>6</sup> defined the parameter  $N$  as the number of lattices that a polymer chain occupies, and therefore  $N = DP \cdot (v_m/l^3)$  where  $DP$ ,  $v_m$  and  $l^3$  are the degree of polymerization, monomer volume and reference volume. The reference volume is taken to be the lattice size cubed ( $l^3 = 0.0366 \text{ nm}^3$ ). Similarly, the polymer charge density  $\sigma$  is also corrected by this volume ratio, which follows  $\sigma = z/N = (z/DP)/(v_m/l^3)$ , where  $z$  is the net charges per polymer chain. In this study, we take the harmonic mean of the  $DP$  of KPSS and PDADMAB,<sup>7</sup> which gives the average degree of polymerization ( $DP^*$ ) of  $[2/(1/315+1/107)] = 160$ . As both KPSS and PDADMAB are strong polyelectrolytes, with charge densities ( $z/DP$ ) close to 1;  $v_m/l^3 = 6.4$ . Therefore, we used  $N = 160 \times 6.4 = 1025 \approx 1000$ , and  $\sigma = 1/6.4 = 0.156 \approx 0.1$  in the calculation, as stated in the main text.

The  $\varepsilon_0$  and  $\chi$  used to construct Figure 2a in the main text are summarized in Table S7; VO predicts positive tie lines for all binodal curves, and a few representatives are shown in Figure S4 (these details are omitted in Figure 2a for clarity).

**Table S7.** Parameters used in VO model at 293 K.

| Solvent composition    | $\varphi_{\text{EG}}^{\text{S}}$ or $\varphi_{\text{NMF}}^{\text{S}}$ [-] | $\varepsilon_0$ [-] | $\chi$ [-] |
|------------------------|---------------------------------------------------------------------------|---------------------|------------|
| EG + H <sub>2</sub> O  | 0.50                                                                      | 62.7                | 0.302      |
|                        | 0.40                                                                      | 66.5                | 0.341      |
|                        | 0.25                                                                      | 71.6                | 0.401      |
|                        | 0.10                                                                      | 76.8                | 0.460      |
| H <sub>2</sub> O       | 0                                                                         | 80.0                | 0.500      |
| NMF + H <sub>2</sub> O | 0.10                                                                      | 83.2                | 0.458      |
|                        | 0.25                                                                      | 88.0                | 0.395      |
|                        | 0.40                                                                      | 95.3                | 0.332      |
|                        | 0.50                                                                      | 102.1               | 0.290      |

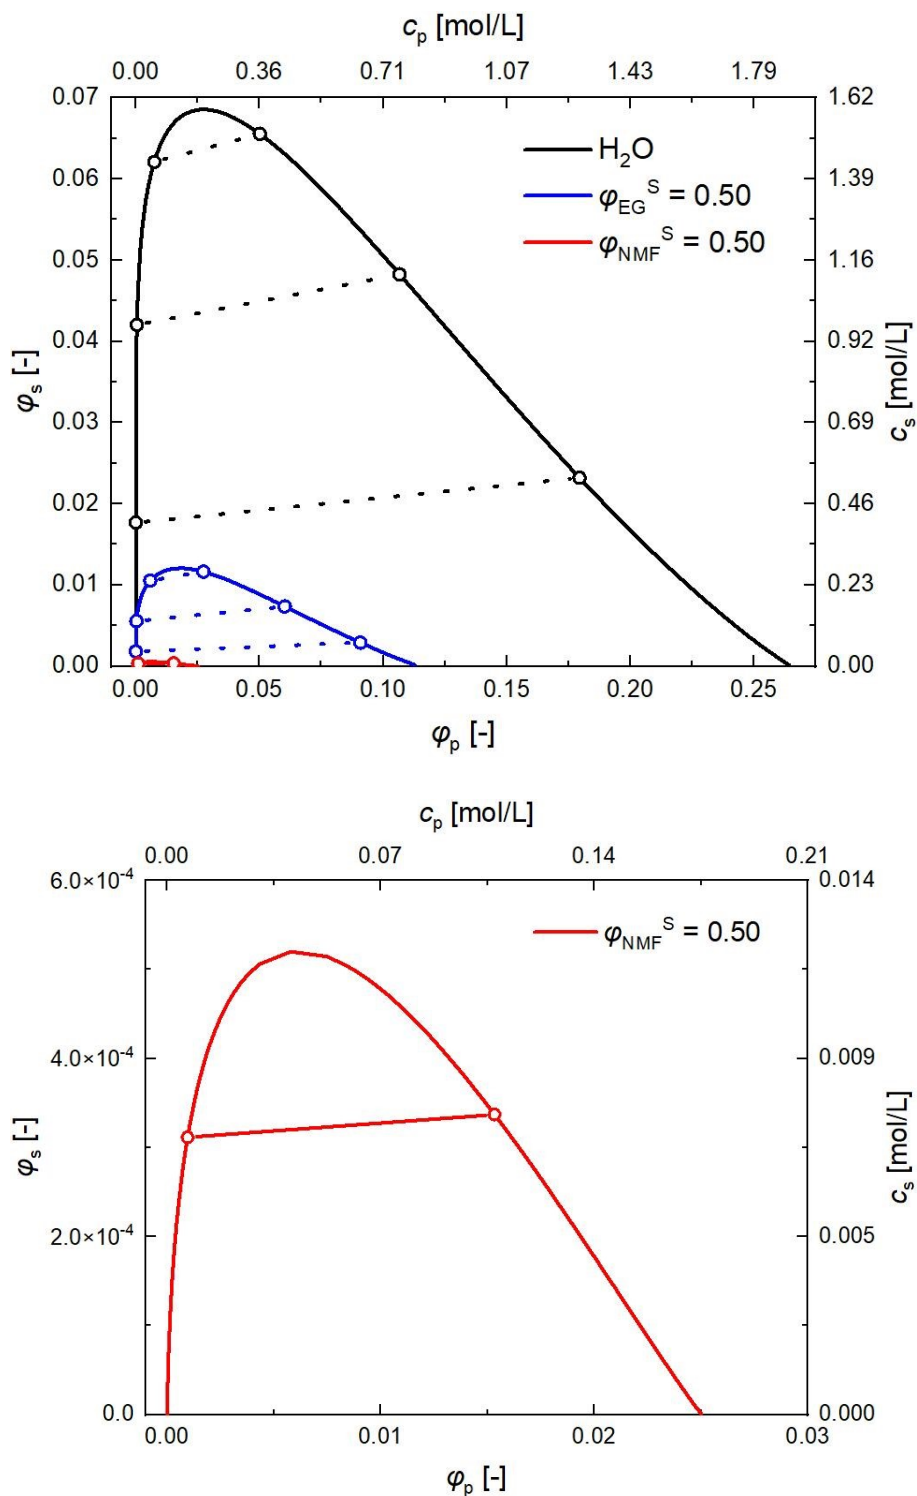

**Figure S4.** Top: representative VO phase diagrams (solid lines) of KPSS-PDADMAB complexes in pure  $\text{H}_2\text{O}$  (black),  $\text{EG}/\text{H}_2\text{O}=50/50$  (blue), and  $\text{NMF}/\text{H}_2\text{O}=50/50$  (red), showing the tie lines (dashed lines) in each case. Bottom: zoom-in view of the red curve.  $T = 293$  K.

## Parameterization of VO model at 313 and 333 K

$\varepsilon_0(T)$  of pure water,<sup>10</sup> EG<sup>11</sup> and NMF<sup>8,9</sup> are available in literature (Figure S5a), and their corresponding Bjerrum lengths,  $l_B(T) \sim 1/[\varepsilon_0(T) \cdot T]$ , all monotonically increase with  $T$  (Figure S5b). At elevated temperatures,  $\varepsilon_0(T)$  of the solvent mixtures can be determined by interpolation of the literature data in Figure S5a. The results are shown in Figure S6 and S7. In Figure S6, the interpolated  $\varepsilon_{0,\text{EG-H}_2\text{O}}(T)$  at  $\varphi_{\text{EG}}^S = 0$  to 0.5 agree well with the values given by Akerlof,<sup>11</sup> with difference smaller than 1. In Figure S7, to the best of our knowledge, there are no literature data of  $\varepsilon_{0,\text{NMF-H}_2\text{O}}(T)$  available above 30 °C. Nevertheless, the interpolated data at  $T = 40$  °C and 60 °C are generally in accord with those measured by Rohdewald *et al.*<sup>12</sup> and Sengwa *et al.*<sup>13</sup>

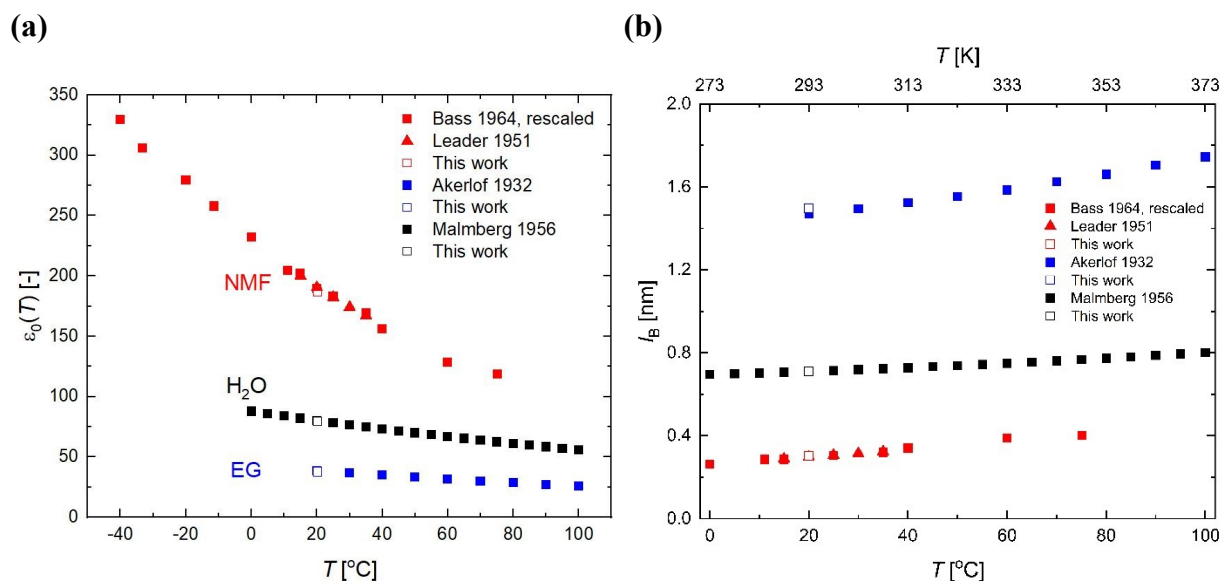

**Figure S5.** (a)  $\varepsilon_0$  and (b)  $l_B$  as a function of temperature for pure H<sub>2</sub>O, EG and NMF. The solid symbols represent the data from literature,<sup>8,9,10,11</sup> and the open symbols represent the values measured by us. The  $\varepsilon_{0,\text{NMF}}$  values measured by Bass *et al.*<sup>8</sup> are multiplied by a factor of 1.07 to be consistent with others.

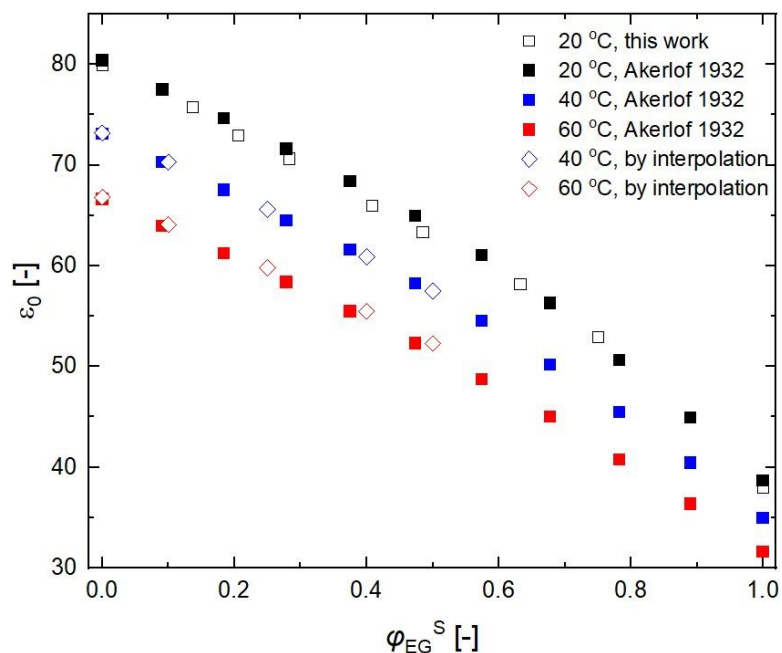

**Figure S6.**  $\epsilon_0$  as a function of  $\phi_{EG}^S$  at various  $T$ . The solid symbols represent the data from literature.<sup>11</sup> The open symbols represent the values calculated by interpolation of Figure S5a datasets with respect to volume fraction.

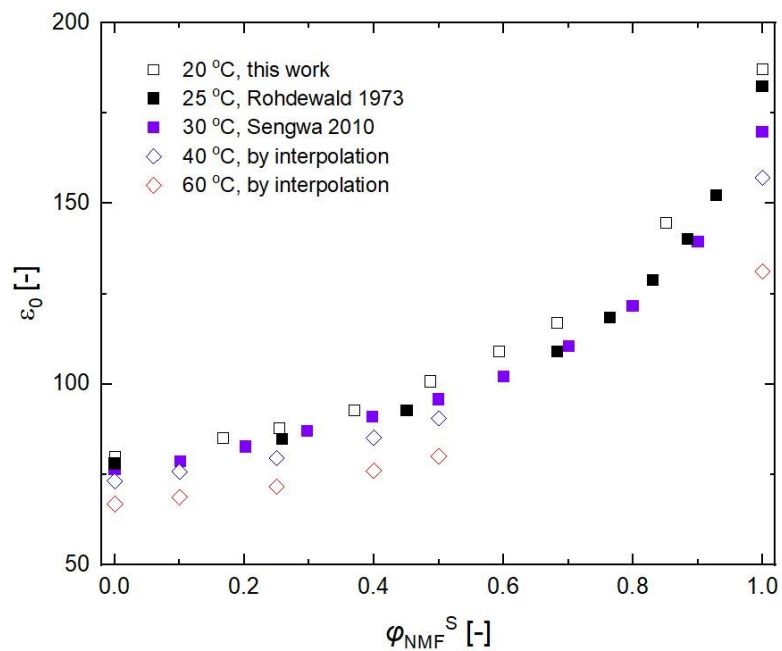

**Figure S7.**  $\epsilon_0$  as a function of  $\phi_{NMF}^S$  at various  $T$ . The solid symbols represent the data from literature.<sup>12,13</sup> The open symbols represent the values calculated by interpolation of Figure S5a datasets with respect to volume fraction.

Table S8 summarizes the  $\varepsilon_0$  and  $\chi$  values used to simulate the binodal phase boundaries of polyelectrolyte complexes (PEC) in binary solvent mixtures at 313 K and 333 K. The temperature-dependent solvent dielectric constants [ $\varepsilon_0(T)$ ] were extracted from Figure S6 and S7 (the blue and red diamonds for 313 K and 333 K, respectively). Notably, we parameterized the temperature-dependent  $\chi(T)$  as:  $\chi(T) = \chi(293)(0.2 \times 293/T + 0.8)$ , where  $\chi(293) = 0.50, 0.10$  and  $0.080$  for  $\text{H}_2\text{O}$ , EG and NMF as stated in Table 2 of the main text. The solvent density only weakly depends on  $T$ , and therefore was treated as  $T$ -independent.

**Table S8.** Parameters used in VO model at 313 K and 333 K.

| Solvent composition        | $\varphi_{\text{EG}}^{\text{S}}$ or $\varphi_{\text{NMF}}^{\text{S}}$ [-] | $T = 313 \text{ K}$ |            | $T = 333 \text{ K}$ |            |
|----------------------------|---------------------------------------------------------------------------|---------------------|------------|---------------------|------------|
|                            |                                                                           | $\varepsilon_0$ [-] | $\chi$ [-] | $\varepsilon_0$ [-] | $\chi$ [-] |
| EG + $\text{H}_2\text{O}$  | 0.50                                                                      | 57.4                | 0.298      | 52.3                | 0.294      |
| $\text{H}_2\text{O}$       | 0                                                                         | 73.2                | 0.494      | 66.8                | 0.488      |
| NMF + $\text{H}_2\text{O}$ | 0.50                                                                      | 90.5                | 0.286      | 80.1                | 0.283      |

The model prediction results are shown in Figure S8. For PEC in  $\text{H}_2\text{O}$ , and 50:50 volume fraction mixtures with EG and NMF, the theoretical phase diagrams shift upward as  $T$  increases from 293 K to 333 K, which indicates decreased miscibility and recovers the experimental observation of lower critical solution temperature behaviors. Nonetheless, a stronger  $\chi(T)$  function, for example,  $\chi(T) = \chi(293)(293/T)$ , will make the VO model to predict upper critical solution temperature behaviors, as illustrated in Figure S9.

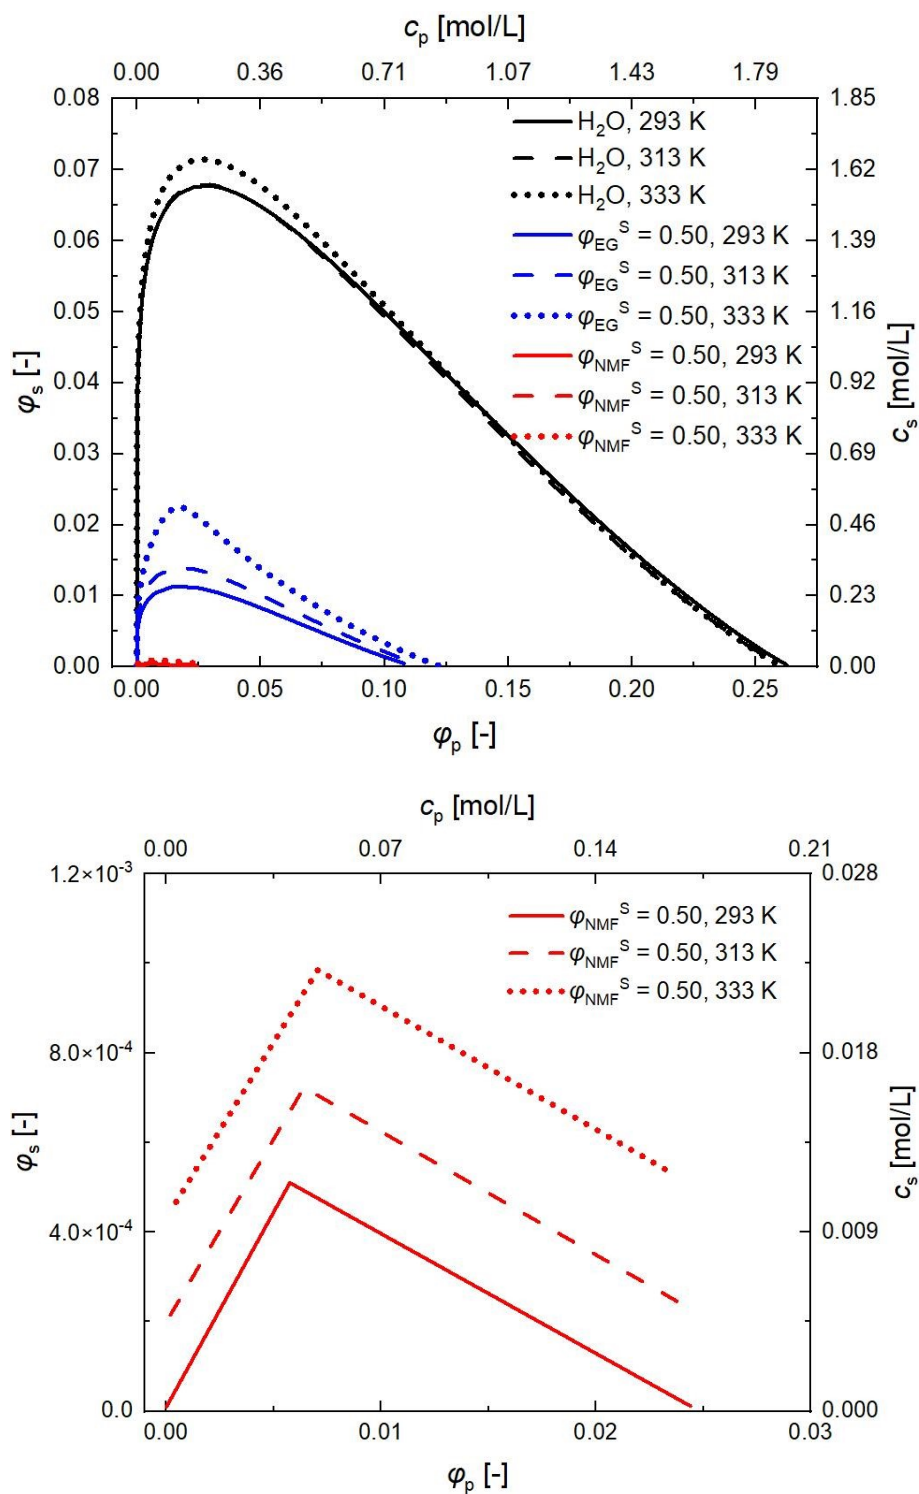

**Figure S8.** Top: representative theoretical  $\phi_s$ - $\phi_p$  phase diagrams of three solvent compositions (water, EG/H<sub>2</sub>O=50/50, and NMF/H<sub>2</sub>O=50/50) at 293 K, 313 K and 333 K, assuming  $\chi_{\text{solvent-p}}(T) = \chi_{\text{solvent-p}}(293)(0.2 \times 293/T + 0.8)$ . Bottom: zoom-in view of the red curves.

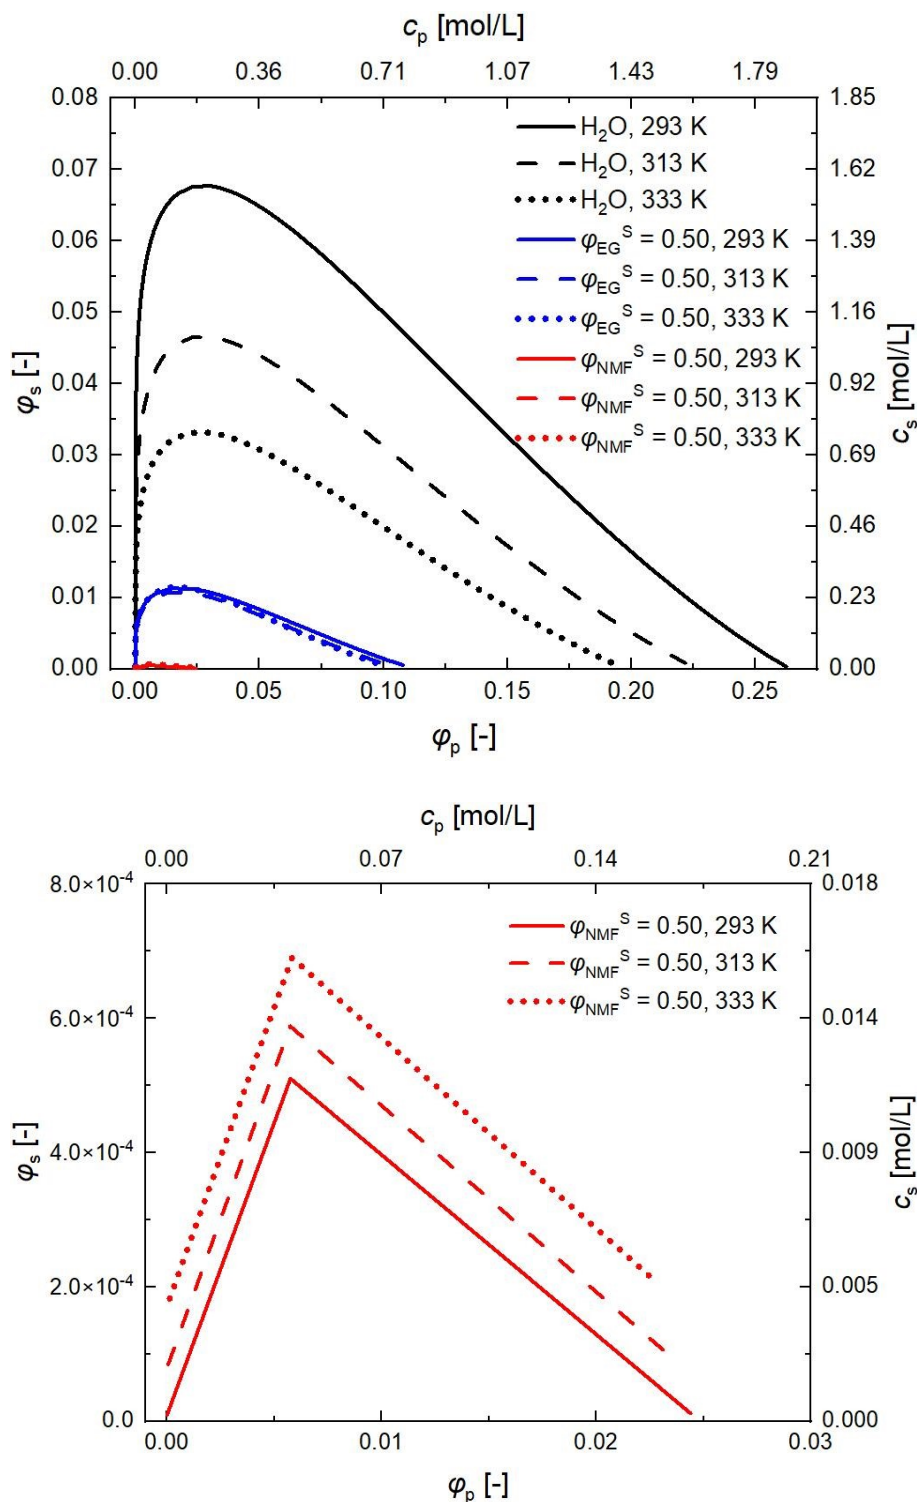

**Figure S9.** Top: representative theoretical  $\phi_s$ - $\phi_p$  phase diagrams of three solvent compositions (water, EG/H<sub>2</sub>O=50/50, and NMF/H<sub>2</sub>O=50/50) at 293 K, 313 K and 333 K, assuming  $\chi_{\text{solvent-p}}(T) = \chi_{\text{solvent-p}}(293)(293/T)$ . Bottom: zoom-in view of the red curves.

## Section IV. Determination of $R_{h,eq}$ of the PEC Aggregates by DLS

### DLS Autocorrelation Functions and Fit

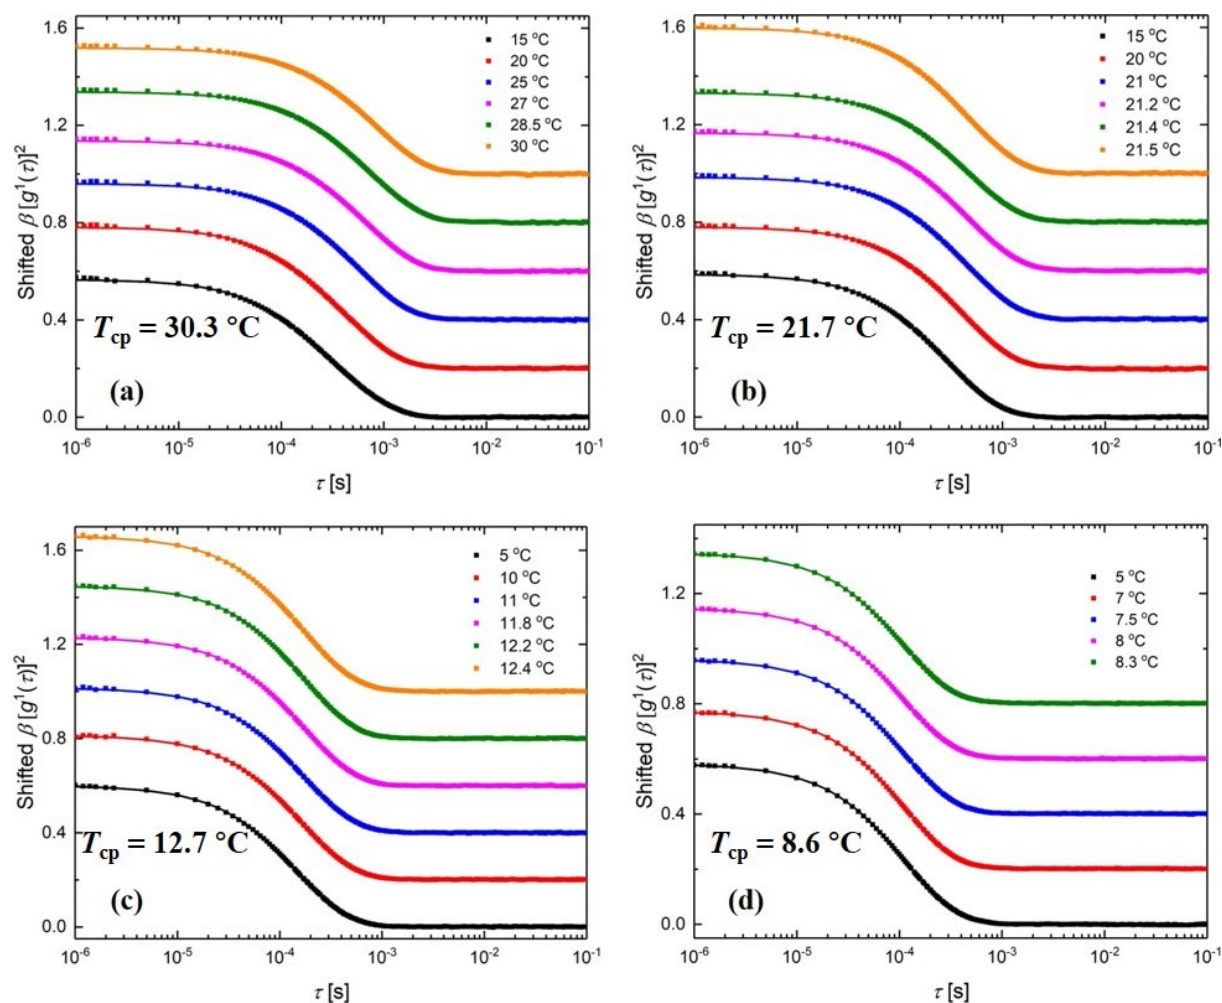

**Figure S10.** The baseline-subtracted autocorrelation functions of KPSS-PDADMAB complexes in water with  $c_s = 1.80$  mol/L and  $c_p =$  (a) 0.3 mol/L, (b) 0.2 mol/L, (c) 0.1 mol/L, and (d) 0.05 mol/L. The solid lines are best fit to the quadratic cumulant function,  $\beta[g_1(\tau)]^2 = A \cdot \exp[(-2\Gamma\tau)(1 + \mu_2\tau^2/2)]$ . Within each group, every curve is shifted by 0.2, for clarity. The cloud point temperatures ( $T_{cp}$ ) of each sample were noted, marking the upper bound of each measurement.

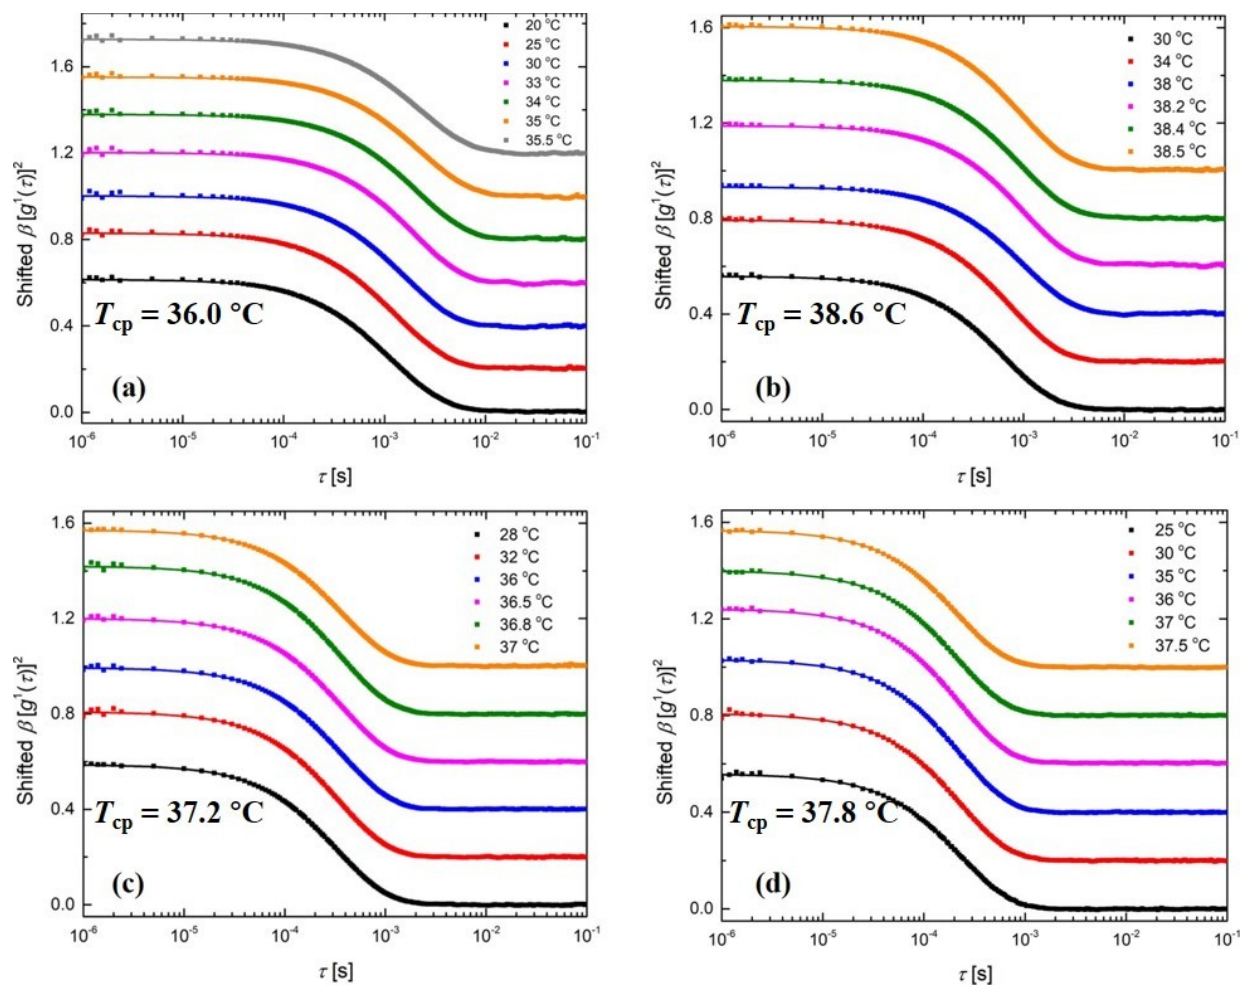

**Figure S11.** The baseline-subtracted autocorrelation functions of KPSS-PDADMAB complexes in EG/H<sub>2</sub>O=50/50 with  $c_s = 1.10$  mol/L and  $c_p =$  (a) 0.3 mol/L, (b) 0.2 mol/L, (c) 0.1 mol/L, and (d) 0.05 mol/L. The same data processing protocol as Figure S10 was used.

### Viscosity of the Mixed Solvents

The temperature-dependent viscosity of EG/H<sub>2</sub>O mixtures,  $\eta(T)$ , was estimated by interpolation of literature data with respect to molar fractions ( $x_{EG}$ ).<sup>14</sup> Due to asymmetry in molecular weights of the two solvents, the cosolvent with  $\varphi_{EG}^S = 0.50$  is equal to  $x_{EG} = 0.244$ , and its  $\eta(T)$  values (on the log scale) at four specific temperatures were determined by interpolation of the literature data, as shown in Figure S12. The viscosities of  $\varphi_{EG}^S = 0.50$  at other intermediate temperatures were again estimated by interpolation using a third-order polynomial relation.

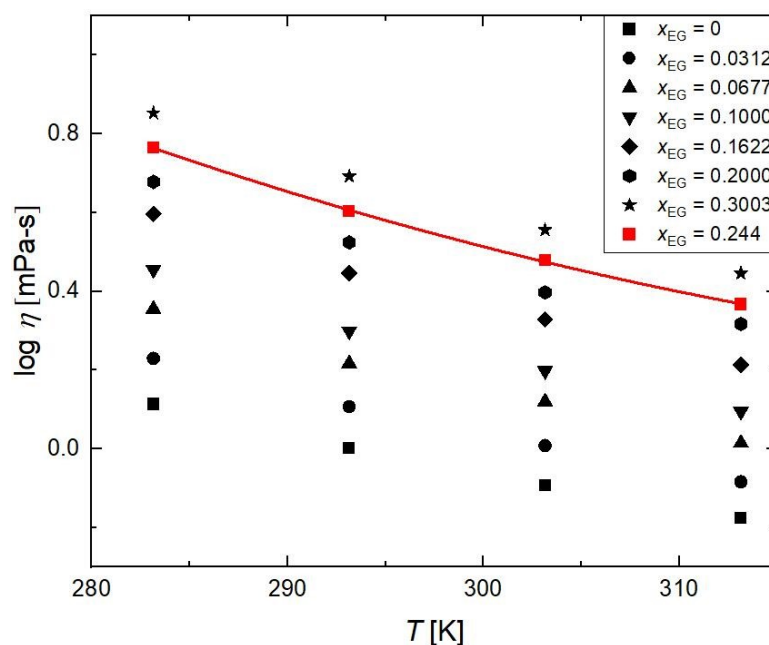

**Figure S12.** Temperature-dependent viscosities  $[\eta(T)]$  of EG/H<sub>2</sub>O mixtures as reported by Tsierkezos *et al.*<sup>14</sup> The black symbols are from the reference, which cover  $x_{\text{EG}} = 0$  to 0.3, corresponding to  $\phi_{\text{EG}}^{\text{S}}$  of 0 to 0.59. The red symbols are interpolation of black symbols to  $x_{\text{EG}} = 0.244$  (corresponding to  $\phi_{\text{EG}}^{\text{S}}$  of 0.50), and the red line is the best cubic fit to the data points.

## References

- (1) Kirkup, L.; Frenkel, B. *An Introduction to Uncertainty in Measurement*, Cambridge University Press, Cambridge, UK (2006).
- (2) van Krevelen, D. W.; te Nijenhuis, K. *Properties of Polymers (4th Ed)*, Elsevier (2009).
- (3) Ferrell, W. H.; Kushner, D. I.; Hickner, M. A. Investigation of polymer–solvent interactions in poly(styrene sulfonate) thin films. *J. Polym. Sci. Part B* **2017**, 55, 1365–1372.
- (4) Lindvig, T.; Michelsen, M. L.; Kontogeorgis, G. M. A Flory–Huggins model based on the Hansen solubility parameters. *Fluid Phase Equilibria* **2002**, 203, 247–260.
- (5) Venkataraman, S.; Wei, G.; Mineart, K. P.; Hedrick, J. L.; Prabhu, V. M.; Yang, Y. Y. The effect of solvent quality on pathway-dependent solution-state self-assembly of an amphiphilic diblock copolymer. *J. Appl. Phys.* **2020**, 127(12), 125104.
- (6) Overbeek, J. T. G.; Voorn, M. J. Phase separation in polyelectrolyte solutions. Theory of complex coacervation. *J. Cell. Physiol.* **1957**, 49, 7–26.
- (7) Audus, D. J.; Ali, S.; Rumyantsev, A. M.; Ma, Y.; de Pablo, J. J.; Prabhu, V. M. Molecular

---

Mass Dependence of Interfacial Tension in Complex Coacervation. *Phys. Rev. Lett.* **2021**, *126*, 237801.

(8) Bass, S. J.; Nathan, W. I.; Meighan, R. M.; Cole, R. H. Dielectric Properties of Alkyl Amides. II. Liquid Dielectric Constant and Loss. *J. Phys. Chem.* **1964**, *68*, 3, 509–515.

(9) Leader, G. R.; Gormley, J. F. The Dielectric Constant of N-Methylamides. *J. Am. Chem. Soc.* **1951**, *73*, 12, 5731–5733.

(10) Malmberg, C. G.; Maryott, A. A. Dielectric constant of water from 0° to 100 °C. *J. Res. Natl. Bur. Stand.* **1956**, *56*, 1-8.

(11) Akerlof, G. Dielectric constants of some organic solvent-water mixtures at various temperatures. *J. Am. Chem. Soc.* **1932**, *54*, 11, 4125–4139.

(12) Rohdewald, P.; Moldner, M. Dielectric Constants of Amide-Water Systems. *J. Phys. Chem.* **1973**, *77*, 3, 373-377.

(13) Sengwa, R. J.; Sankhla, S.; Khatri, V. Static dielectric constants of the binary mixtures of N-methylformamide with water, ethyl alcohol, ethylene glycol, dimethylsulphoxide, acetone and 1,4-dioxane. *Philos. Mag. Lett.* **2010**, *90*, 7, 463–470.

(14) Tsierkezos, N. G.; Molinou, I. E. Thermodynamic Properties of Water + Ethylene Glycol at 283.15, 293.15, 303.15, and 313.15 K. *J. Chem. Eng. Data* **1998**, *43*, 989-993.
